# Supplementary material for: Low temperature NH3 regeneration of a sulfur poisoned Pt/Al2O3 monolith catalyst
Source: Royal Society of Chemistry journal article supplement (doi:10.1039/d3cy01153d), 2023-01-01
Supplement: d3cy01153d1.pdf [file d3cy01153d1.pdf]

## Supporting Information

### Sulfur Poisoning and NH<sub>3</sub> Regeneration of Pt/Al<sub>2</sub>O<sub>3</sub> Monolith Catalyst

Chenhao Fang and Michael P. Harold\*

*William A. Brookshire Department of Chemical & Biomolecular Engineering,  
University of Houston, Houston, Texas 77204, (USA),*

*\*Corresponding author e-mail: [mpharold@central.uh.edu](mailto:mpharold@central.uh.edu)*

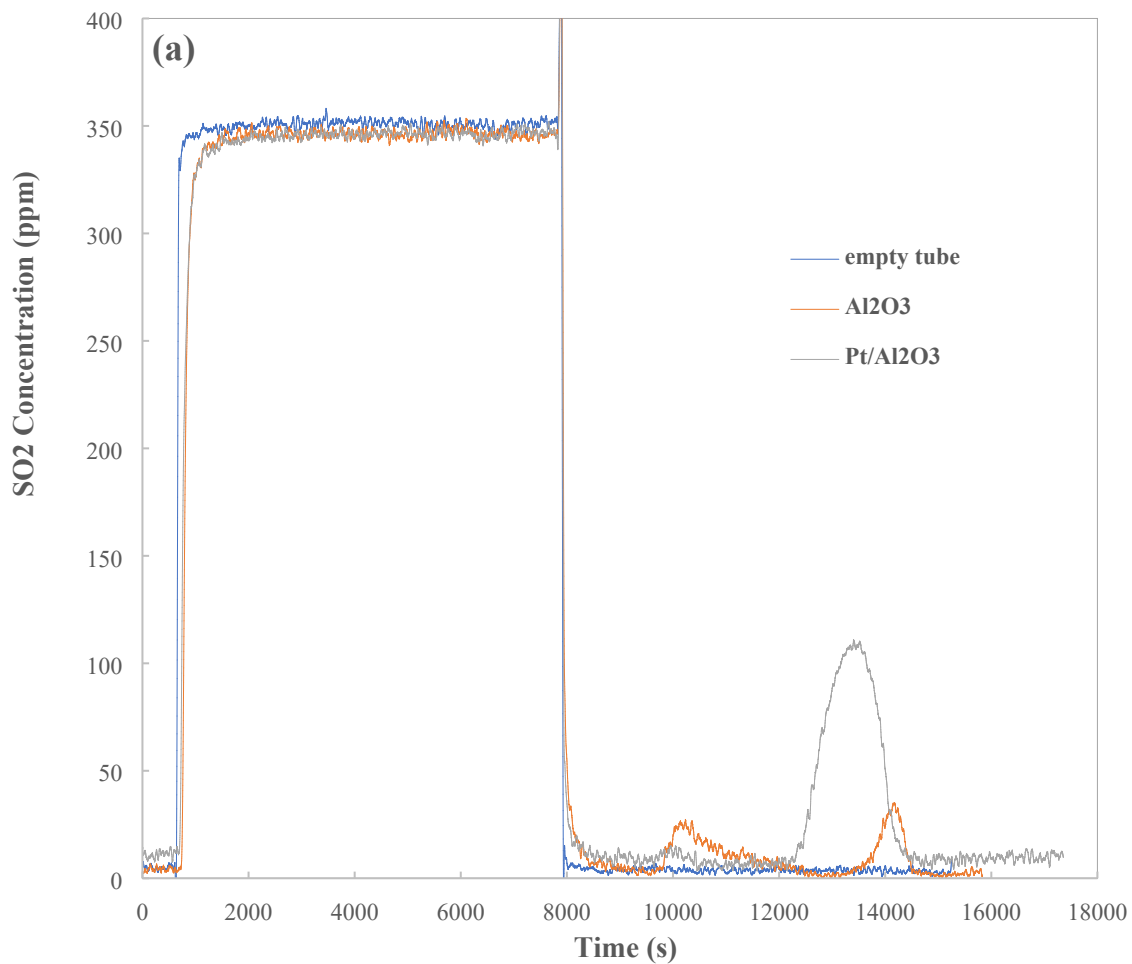

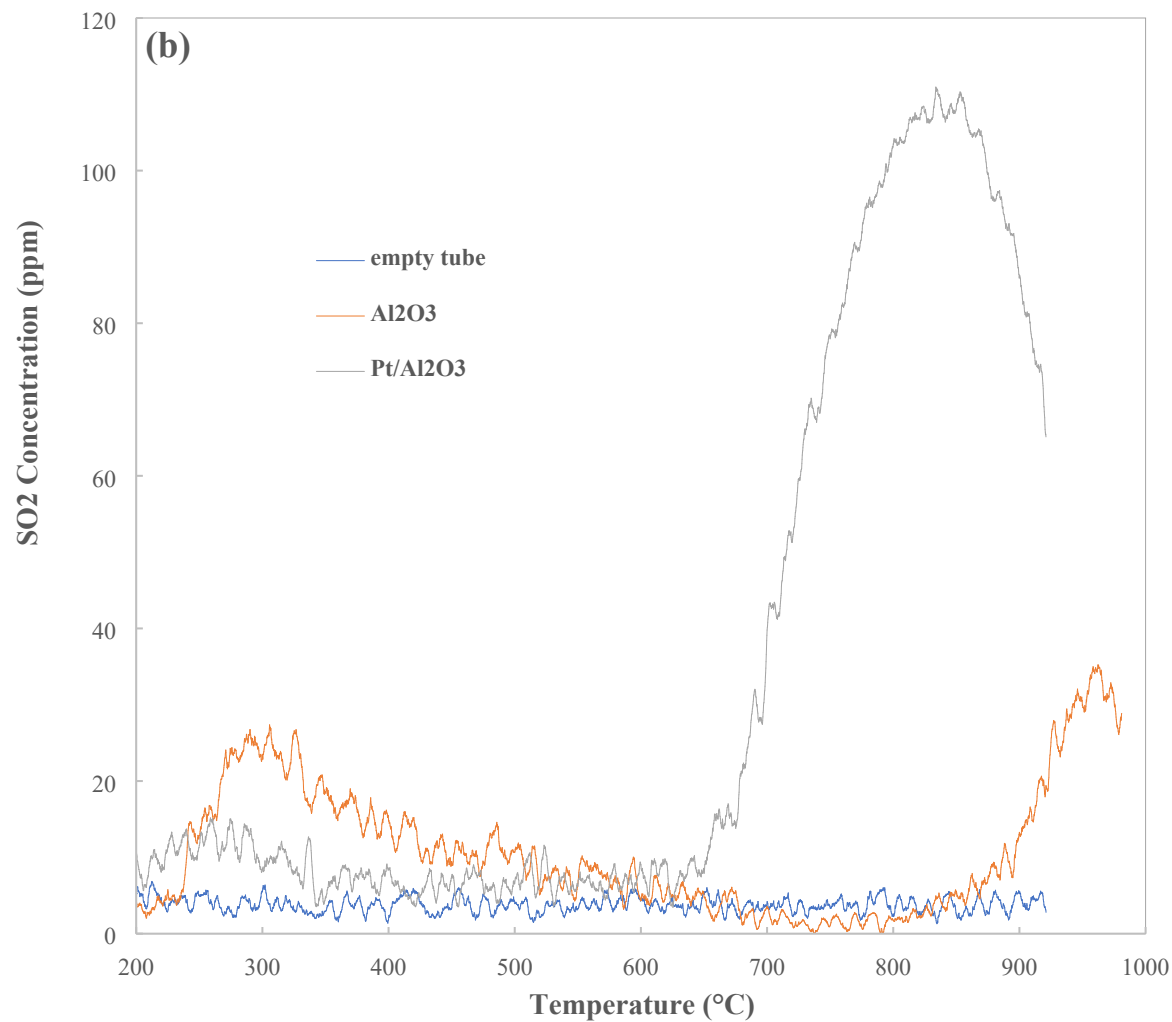

Fig. S1 SO<sub>2</sub> TPD profiles for Al<sub>2</sub>O<sub>3</sub> and Pt/Al<sub>2</sub>O<sub>3</sub> (a) concentration versus time and (b) concentration versus temperature.

**Table S1 Amount of SO<sub>2</sub> adsorbed and desorbed during SO<sub>2</sub> TPD in Ar**

| Sample                            | SO <sub>2</sub> adsorbed (μmol) | SO <sub>2</sub> desorbed (μmol) |
|-----------------------------------|---------------------------------|---------------------------------|
| Al <sub>2</sub> O <sub>3</sub>    | 4.66                            | 4.29                            |
| Pt/Al <sub>2</sub> O <sub>3</sub> | 8.78                            | 8.7                             |

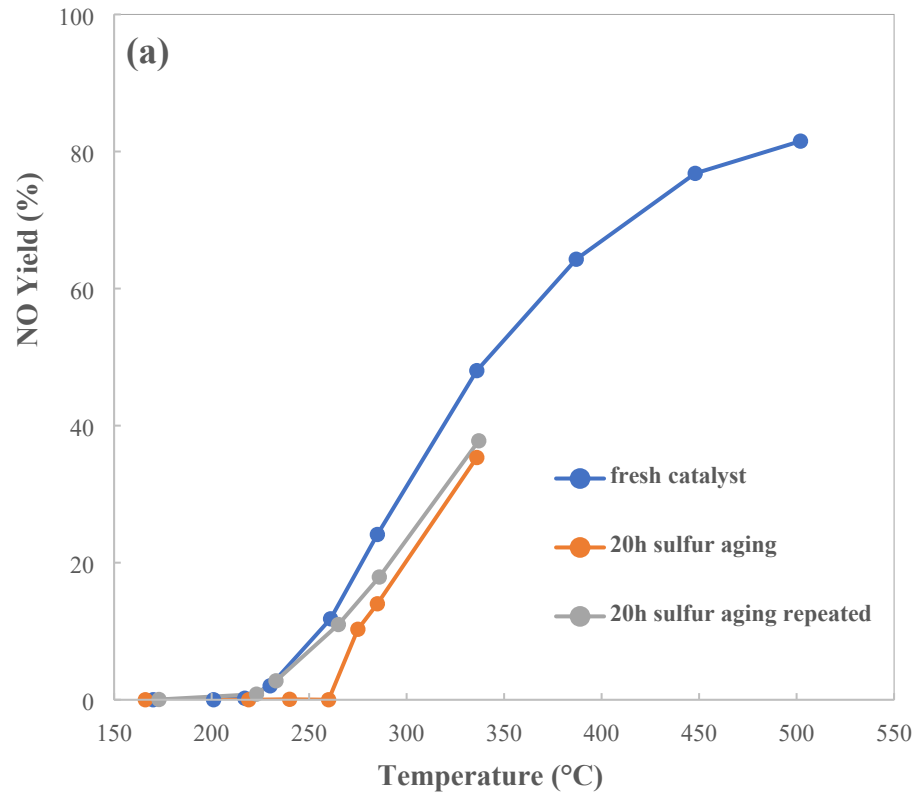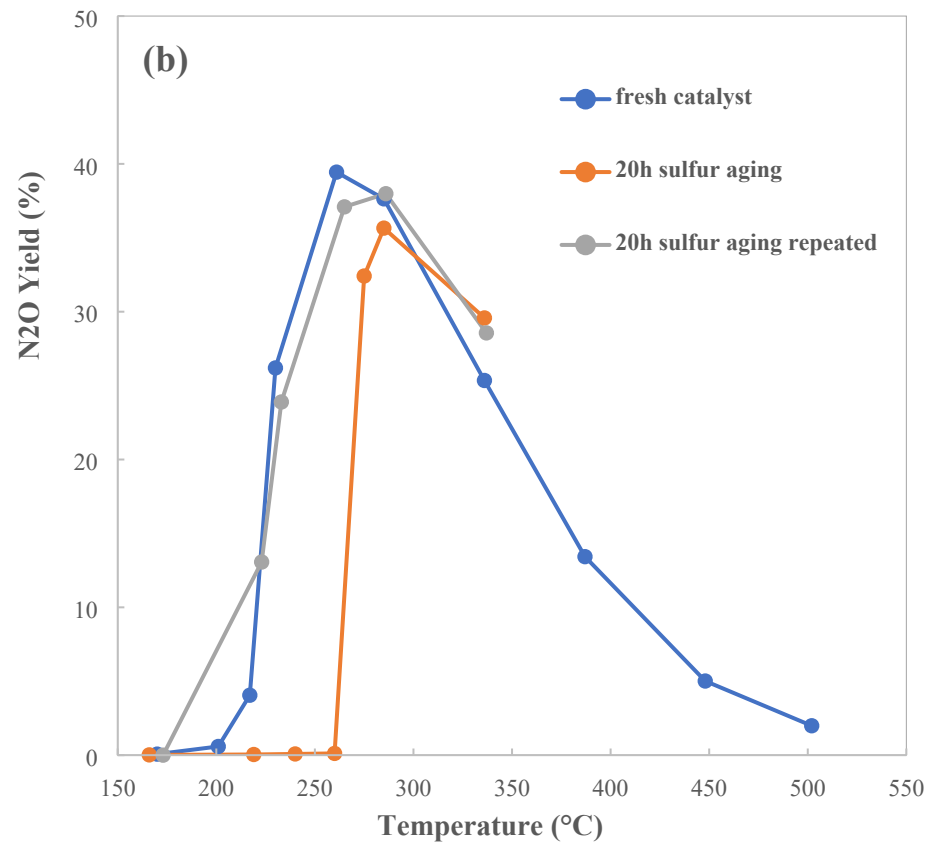

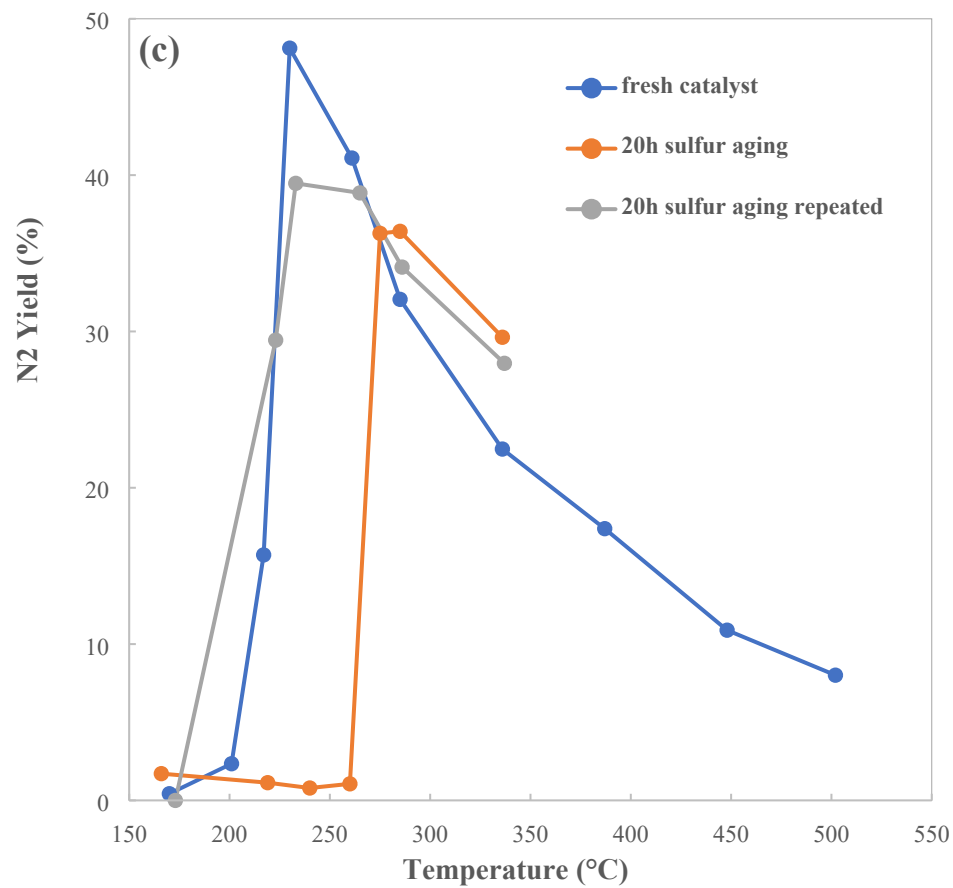

Fig. S2 Steady-state (a) NO yield, (b) N<sub>2</sub>O yield, (c) N<sub>2</sub> yield over fresh and poisoned Pt/Al<sub>2</sub>O<sub>3</sub> catalyst which is sulfur poisoned in the absence of water.

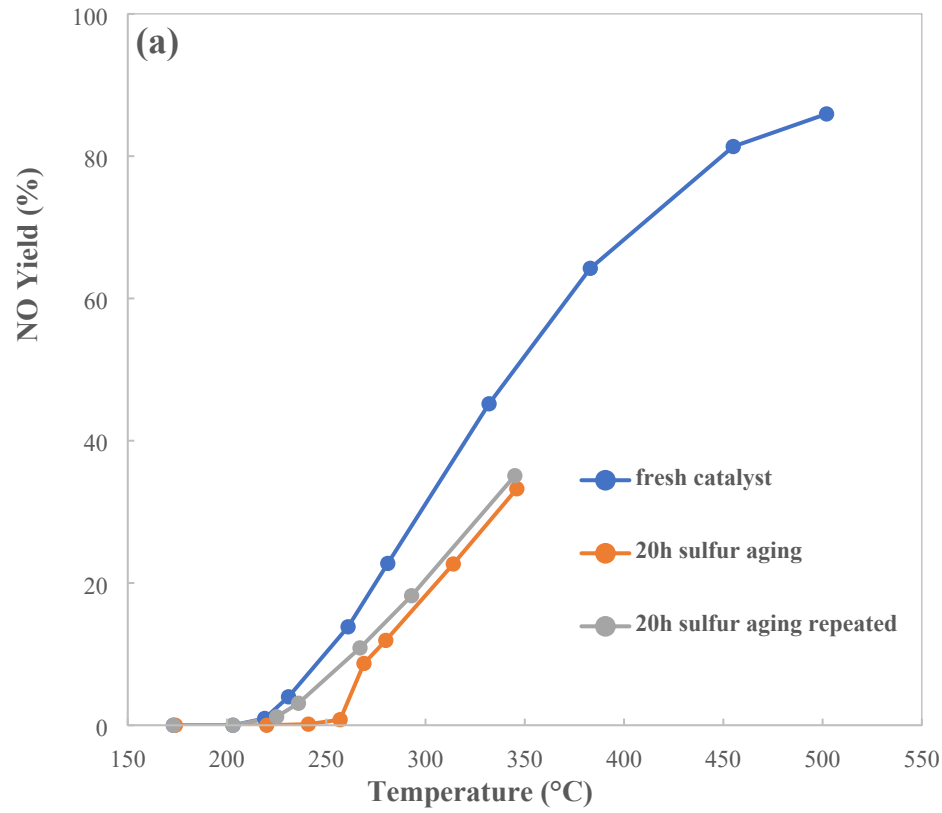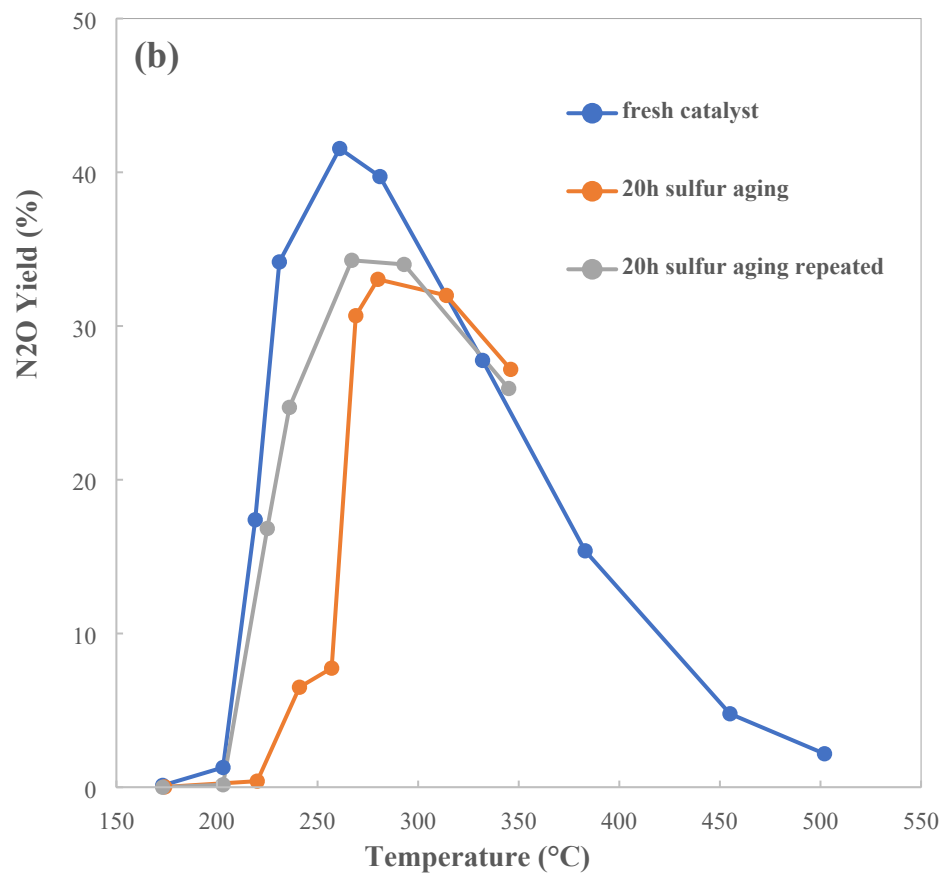

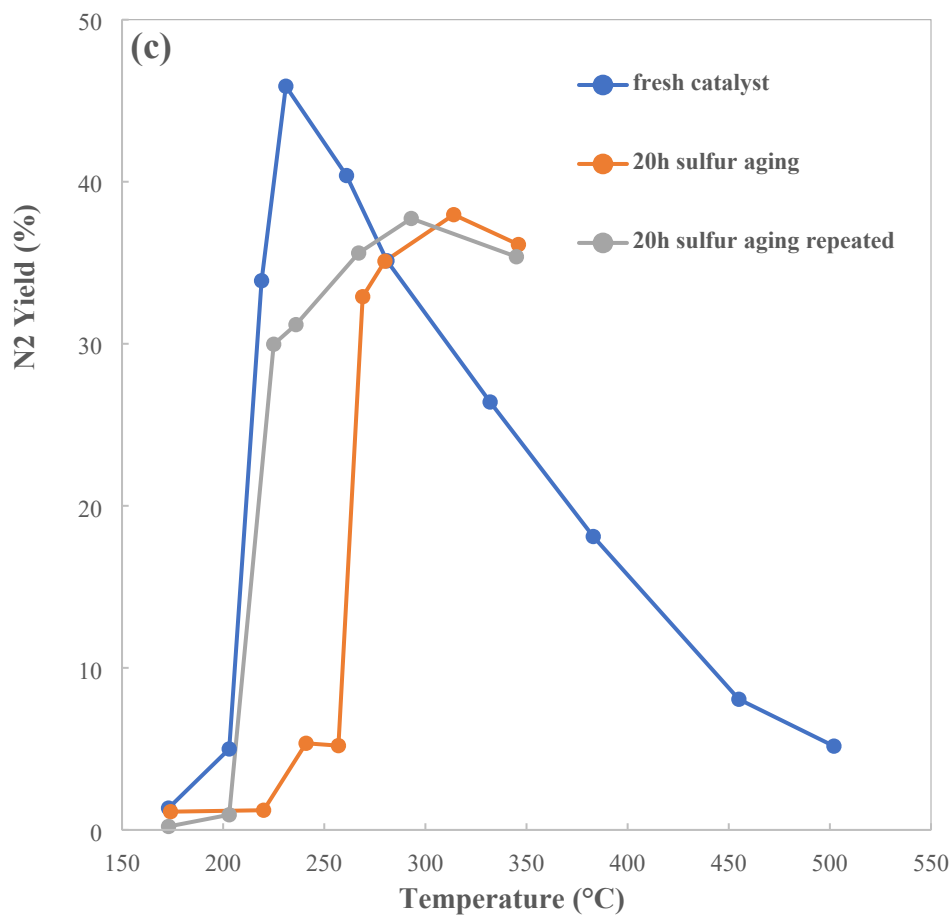

Fig. S3 Steady-state (a) NO yield, (b) N<sub>2</sub>O yield, (c) N<sub>2</sub> yield over fresh and poisoned Pt/Al<sub>2</sub>O<sub>3</sub> catalyst which is sulfur poisoned in the presence of water.

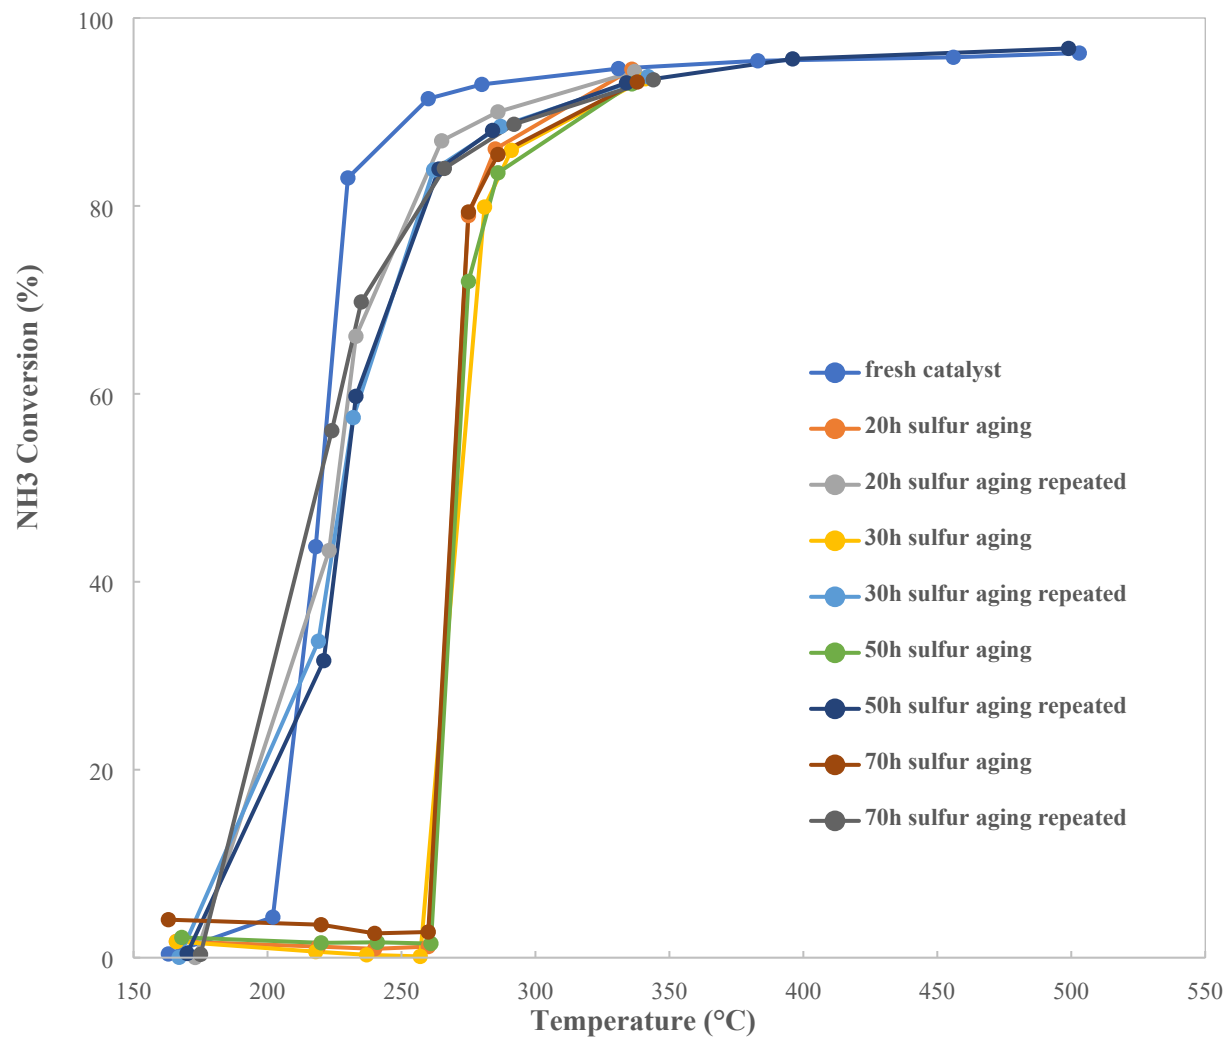

Fig. S4 Steady-state NH<sub>3</sub> oxidation over fresh and various sulfur aged catalyst.

## S5. Adiabatic temperature rise for NH<sub>3</sub> oxidation

In this section, the adiabatic temperature rise for NH<sub>3</sub> oxidation taking place during typical light-off experiments is estimated. Considering the following reaction of NH<sub>3</sub> oxidation over Pt:

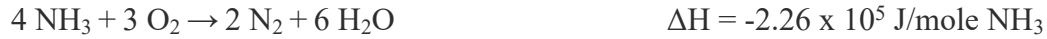

The adiabatic temperature rise is determined from:

$$\Delta T = \frac{(-\Delta H)C_{0,\text{NH}_3}}{\rho_g C_{pg}} \Delta X$$

where

$\Delta H$  = enthalpy of reaction (kJ/mole NH<sub>3</sub>)

$C_{0,\text{NH}_3}$  = Molar concentration of NH<sub>3</sub> (mole/m<sup>3</sup>)

$\rho_g$  = Density of reacting gas (kg/m<sup>3</sup>)

$C_{pg}$  = Specific heat of the reacting gas (kJ/kg/K)

$\Delta X$  = NH<sub>3</sub> conversion

We evaluate the case of high NH<sub>3</sub> concentration feed at complete NH<sub>3</sub> conversion.

Case 1: 5000 ppm NH<sub>3</sub>, 10 vol. % O<sub>2</sub>, balance Argon @ 100% ammonia conversion for washcoated monolith

$$\Delta T = \frac{(-\Delta H)C_{0,\text{NH}_3}}{\rho_g C_{pg}} \Delta X = \frac{(226) * 0.22}{1.7307 * 0.61} * 1 = 48 \text{ K}$$
